# Supplementary material
Source: publisher figshare collection journal article supplement (https://sage.figshare.com/ndownloader/files/15460274)
Supplement: Supplementary file 1 [file 15460274]

APPENDIX

**Figure A1** – Leave-one-out cross-validation test results for main effects model using the *most liked leader* measure of leader effects on turnout (model 1, Table 2)

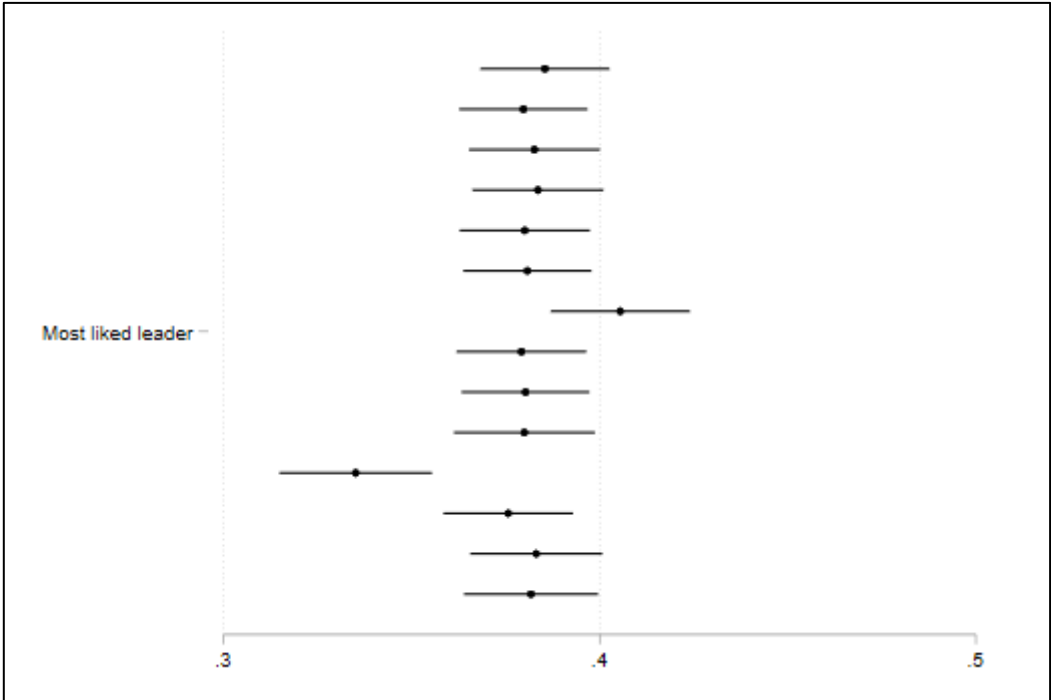

**Figure A2** – Leave-one-out cross-validation test results for main effects model using the H measure of leader effects on turnout (model 2, Table 2)

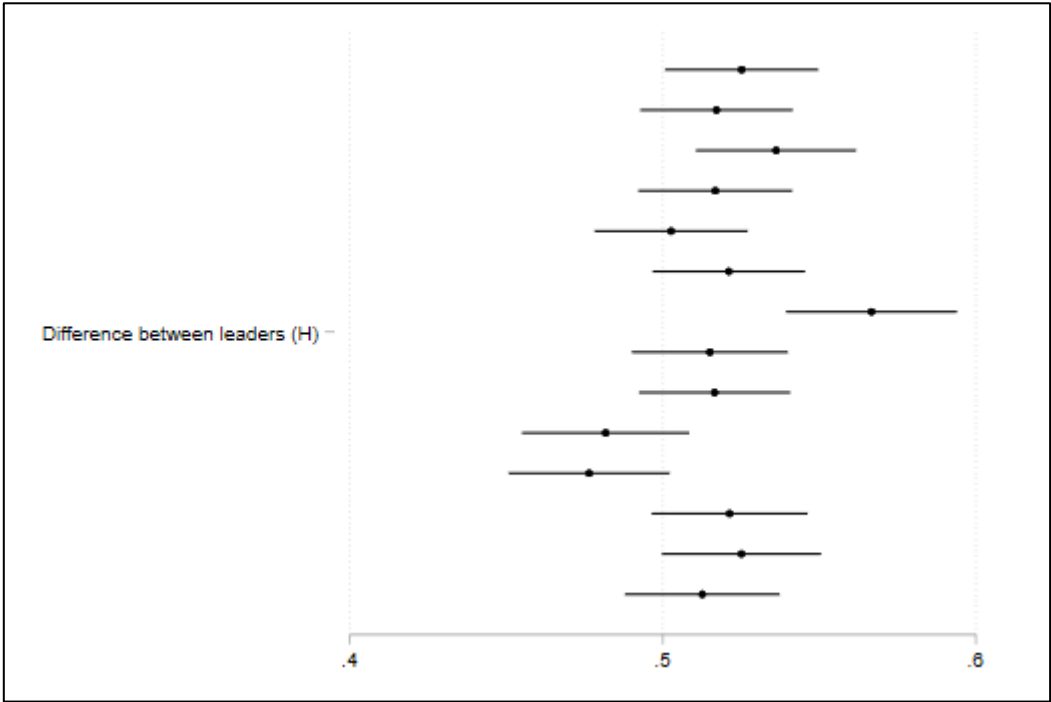

**Figure A3** – Leave-one-out cross-validation test results for the cross-time interaction model between the *most liked leader* measure of leader effects and election-year, and partisanship and election-year (model 3, Table 2)

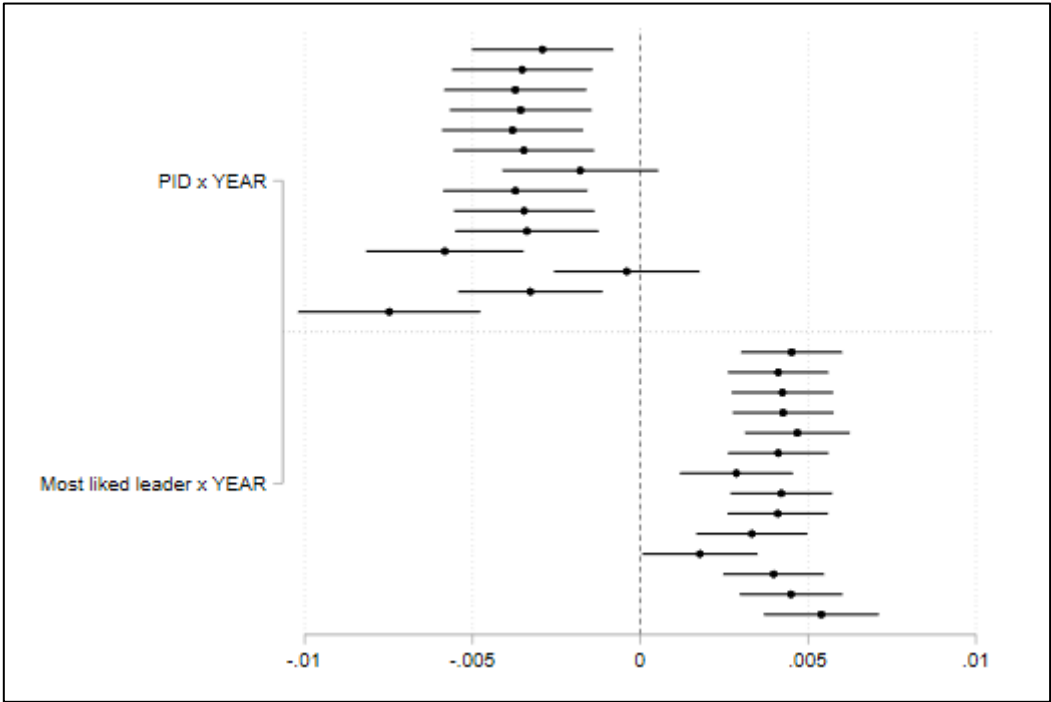

**Figure A4** – Leave-one-out cross-validation test results for the cross-time interaction model between the *most liked leader* measure of leader effects and election-year, and partisanship and election-year – sample of television-centric individuals (model 2, Table 3)

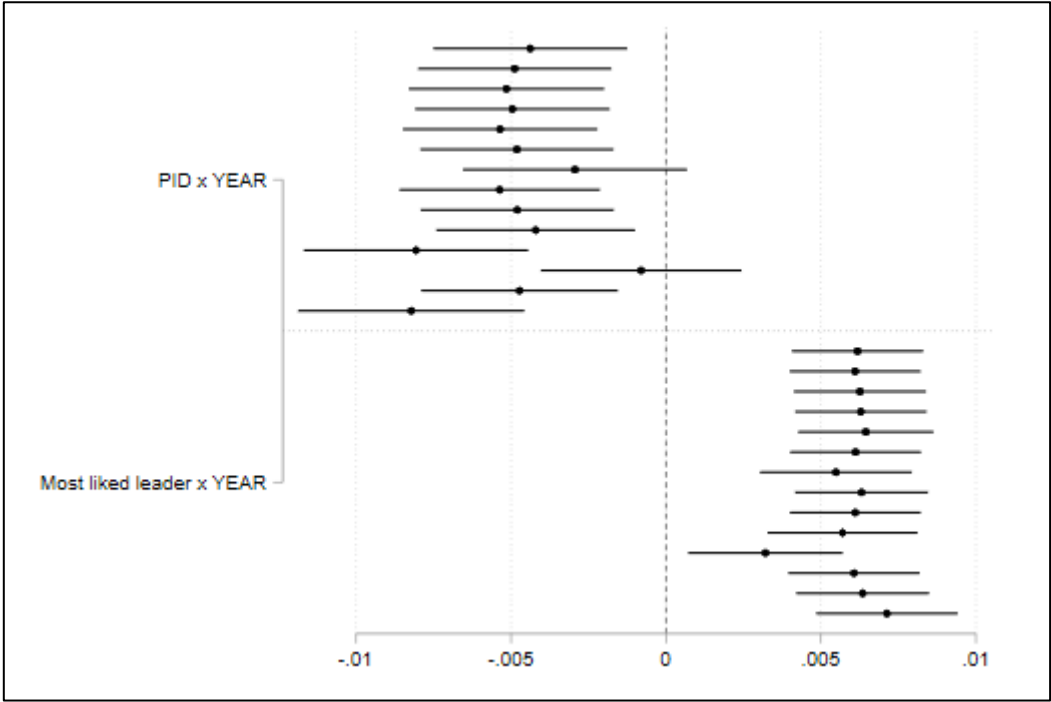

**Table A1** – The impact of voters’ evaluations of party leaders on turnout decisions – effects on abstention by satisfaction: HLM estimation

|                       | (1)                |
|-----------------------|--------------------|
| Age                   | .008***<br>(.001)  |
| Gender                | .047**<br>(.018)   |
| Education             | .141***<br>(.013)  |
| Religiosity           | .022*<br>(.009)    |
| Union membership      | .262***<br>(.026)  |
| Interest in politics  | .564***<br>(.019)  |
| Ideology              | .155***<br>(.006)  |
| Television            | -.141**<br>(.009)  |
| Newspapers            | -.088***<br>(.009) |
| Partisanship          | .510***<br>(.009)  |
| Leaders: Satisfaction | .149***<br>(.009)  |
| Constant              | .081<br>(.152)     |
| Log-likelihood        | -42415.67          |
| Wald chi-2            | 8260.57            |
| AIC                   | 84857.34           |
| BIC                   | 84981.89           |
| N (elections)         | 52                 |
| N (observations)      | 107037             |

**Table A2** – Replication of the models in Table 2, including an additional control for respondents' identification with the party of their most liked leader (0. Does not identify with the party of the most liked leader; 1. Identifies with the party of the most liked leader)

|                                               | (1)                | (2)                | (3)                | (4)                |
|-----------------------------------------------|--------------------|--------------------|--------------------|--------------------|
| Age                                           | .008***<br>(.001)  | .008***<br>(.001)  | .009***<br>(.001)  | .008***<br>(.001)  |
| Gender                                        | .040*<br>(.020)    | .065***<br>(.019)  | .0382<br>(.020)    | .063**<br>(.019)   |
| Education                                     | .203***<br>(.015)  | .163***<br>(.014)  | .203***<br>(.015)  | .163***<br>(.014)  |
| Religiosity                                   | .029**<br>(.011)   | .038***<br>(.010)  | .029**<br>(.011)   | .038***<br>(.010)  |
| Union membership                              | .271***<br>(.030)  | .271***<br>(.029)  | .270***<br>(.030)  | .272***<br>(.029)  |
| Interest in politics                          | .561***<br>(.021)  | .578***<br>(.020)  | .559***<br>(.021)  | .578***<br>(.020)  |
| Ideological proximity                         | .129***<br>(.007)  | .166***<br>(.006)  | .129***<br>(.007)  | .166***<br>(.006)  |
| Television                                    | -.114***<br>(.010) | -.136***<br>(.010) | -.114***<br>(.010) | -.135***<br>(.010) |
| Newspapers                                    | -.109***<br>(.010) | -.095***<br>(.010) | -.109***<br>(.010) | -.095***<br>(.010) |
| Partisanship                                  | .506***<br>(.014)  | .523***<br>(.014)  | .511***<br>(.015)  | .526***<br>(.014)  |
| Partisanship (most liked leader's party)      | .112***<br>(.017)  | .161***<br>(.016)  | .291***<br>(.040)  | .321***<br>(.039)  |
| Leader: Most liked leader                     | .356***<br>(.010)  |                    | .188***<br>(.036)  |                    |
| Leaders: difference between leaders (H)       |                    | .447***<br>(.014)  |                    | .068<br>(.055)     |
| Leaders: Most liked leader*Year               |                    |                    | .005***<br>(.001)  |                    |
| Leaders: difference between leaders (H)*Year  |                    |                    |                    | .012***<br>(.002)  |
| Partisanship (most liked leader's party)*Year |                    |                    | -.006***<br>(.001) | -.005***<br>(.001) |
| Year                                          |                    |                    | -.034**<br>(.013)  | -.036**<br>(.013)  |
| Constant                                      | .306<br>(.157)     | .128<br>(.160)     | 1.29**<br>(.392)   | 1.16**<br>(.398)   |
| Log-likelihood                                | -34611.659         | -36857.14          | -34588.07          | -36820.882         |
| Wald chi-2                                    | 9516.36            | 10682.41           | 9558.35            | 10735.73           |
| AIC                                           | 69251.32           | 73742.28           | 69210.14           | 73675.76           |
| BIC                                           | 69384.08           | 73875.51           | 69371.35           | 73837.54           |
| N (elections)                                 | 52                 | 52                 | 52                 | 52                 |
| N (observations)                              | 97069              | 100353             | 97069              | 100353             |

**Table A3** – Replication of the models in Table 3, including an additional control for respondents' identification with the party of their most liked leader (0. Does not identify with the party of the most liked leader; 1. Identifies with the party of the most liked leader)

|                                               | (1)                | (2)                | (3)                | (4)                |
|-----------------------------------------------|--------------------|--------------------|--------------------|--------------------|
| Age                                           | .008***<br>(.001)  | .009***<br>(.001)  | .008***<br>(.001)  | .008***<br>(.001)  |
| Gender                                        | .022<br>(.029)     | .057*<br>(.028)    | .040<br>(.028)     | .086**<br>(.027)   |
| Education                                     | .188***<br>(.021)  | .218***<br>(.022)  | .156***<br>(.020)  | .173***<br>(.021)  |
| Religiosity                                   | .034*<br>(.016)    | .018<br>(.014)     | .048**<br>(.015)   | .023<br>(.014)     |
| Union membership                              | .233***<br>(.041)  | .323***<br>(.044)  | .239***<br>(.040)  | .318***<br>(.042)  |
| Interest in politics                          | .548***<br>(.031)  | .539***<br>(.029)  | .575***<br>(.030)  | .549***<br>(.028)  |
| Ideological proximity                         | .126***<br>(.010)  | .132***<br>(.009)  | .158***<br>(.010)  | .172***<br>(.009)  |
| Television                                    | -.065**<br>(.024)  | -.048*<br>(.022)   | -.070**<br>(.023)  | -.059**<br>(.021)  |
| Newspapers                                    | -.176***<br>(.025) | -.171***<br>(.022) | -.177***<br>(.024) | -.153***<br>(.021) |
| Partisanship                                  | .512***<br>(.021)  | .508***<br>(.020)  | .528***<br>(.020)  | .522***<br>(.020)  |
| Partisanship (most liked leader's party)      | .222***<br>(.052)  | .382***<br>(.063)  | .264***<br>(.051)  | .397***<br>(.062)  |
| Leader: Most liked leader                     | .224***<br>(.049)  | .141**<br>(.054)   |                    |                    |
| Leaders: difference between leaders (H)       |                    |                    | .053<br>(.082)     | .063<br>(.074)     |
| Leaders: Most liked leader*Year               | .003*<br>(.001)    | .007***<br>(.002)  |                    |                    |
| Leaders: difference between leaders (H)*Year  |                    |                    | .011***<br>(.002)  | .013***<br>(.002)  |
| Partisanship (most liked leader's party)*Year | -.003*<br>(.002)   | -.009***<br>(.002) | -.003*<br>(.001)   | -.008***<br>(.002) |
| Year                                          | -.035**<br>(.013)  | -.032*<br>(.013)   | -.038**<br>(.013)  | -.035**<br>(.013)  |
| Constant                                      | 1.45***<br>(3.48)  | 1.29**<br>(3.22)   | 1.30**<br>(3.08)   | 1.16**<br>(2.85)   |
| Log-likelihood                                | -16462.17          | -18131.186         | -17590.078         | -19222.712         |
| Wald chi-2                                    | 4916.99            | 4558.91            | 5603.99            | 5017.66            |
| AIC                                           | 32958.34           | 36296.37           | 35214.16           | 38479.42           |
| BIC                                           | 33107.76           | 36445.82           | 35364.18           | 38629.39           |
| N (elections)                                 | 52                 | 52                 | 52                 | 52                 |
| N (observations)                              | 48497              | 48572              | 50256              | 50097              |

**Table A4** – Replication of the models in Table 2, including an additional control for the degree of respondents' identification with the party of their most liked leader (0. Does not identify with the party of the most liked leader; 1. Weakly identifies with the party of the most liked leader; 2. Moderately identifies with the party of the most liked leader; 3. Strongly identifies with the party of the most liked leader)

|                                                            | (1)                | (2)                | (3)                | (4)                |
|------------------------------------------------------------|--------------------|--------------------|--------------------|--------------------|
| Age                                                        | .008***<br>(.001)  | .007***<br>(.001)  | .008***<br>(.001)  | .007***<br>(.001)  |
| Gender                                                     | .038<br>(.020)     | .063**<br>(.019)   | .038<br>(.020)     | .061**<br>(.019)   |
| Education                                                  | .208***<br>(.015)  | .168***<br>(.014)  | .207***<br>(.015)  | .168***<br>(.014)  |
| Religiosity                                                | .029**<br>(.011)   | .037***<br>(.010)  | .029**<br>(.011)   | .037***<br>(.010)  |
| Union membership                                           | .267***<br>(.030)  | .268***<br>(.029)  | .266***<br>(.030)  | .269***<br>(.029)  |
| Interest in politics                                       | .553***<br>(.021)  | .569***<br>(.020)  | .551***<br>(.021)  | .568***<br>(.020)  |
| Ideological proximity                                      | .130***<br>(.007)  | .166***<br>(.006)  | .130***<br>(.007)  | .166***<br>(.006)  |
| Television                                                 | -.114***<br>(.010) | -.135***<br>(.010) | -.113***<br>(.010) | -.134***<br>(.010) |
| Newspapers                                                 | -.108***<br>(.010) | -.093***<br>(.010) | -.108***<br>(.010) | -.093***<br>(.010) |
| Partisanship                                               | .465***<br>(.013)  | .489***<br>(.013)  | .471***<br>(.013)  | .493***<br>(.013)  |
| Degree of Partisanship<br>(most liked leader's party)      | .234***<br>(.018)  | .284***<br>(.018)  | .405***<br>(.042)  | .435***<br>(.041)  |
| Leader: Most liked leader                                  | .345***<br>(.010)  |                    | .160***<br>(.036)  |                    |
| Leaders: difference between leaders (H)                    |                    | .438***<br>(.014)  |                    | .042<br>(.055)     |
| Leaders: Most liked leader*Year                            |                    |                    | .006***<br>(.001)  |                    |
| Leaders: difference between leaders<br>(H)*Year            |                    |                    |                    | .012***<br>(.002)  |
| Degree of Partisanship<br>(most liked leader's party)*Year |                    |                    | -.006***<br>(.001) | -.005***<br>(.001) |
| Year                                                       |                    |                    | -.033**<br>(.013)  | -.035**<br>(.013)  |
| Constant                                                   | .334*<br>(.157)    | .171<br>(.159)     | .297***<br>(.393)  | 1.17**<br>(.399)   |
| Log-likelihood                                             | -34546.397         | -36772.174         | -34523.414         | -36735.911         |
| Wald chi-2                                                 | 9475.16            | 10629.51           | 9515.18            | 10682.79           |
| AIC                                                        | 69120.79           | 73572.35           | 69080.83           | 73505.82           |
| BIC                                                        | 69253.56           | 73705.58           | 69242.04           | 73677.6            |
| N (elections)                                              | 48                 | 48                 | 48                 | 48                 |
| N (observations)                                           | 97069              | 100353             | 97069              | 100353             |

**Table A5** - Replication of the models in Table 3, including an additional control for the degree of respondents' identification with the party of their most liked leader (0. Does not identify with the party of the most liked leader; 1. Weakly identifies with the party of the most liked leader; 2. Moderately identifies with the party of the most liked leader; 3. Strongly identifies with the party of the most liked leader)

|                                                            | <i>Most liked leader</i> |                    | <i>H</i>           |                    |
|------------------------------------------------------------|--------------------------|--------------------|--------------------|--------------------|
|                                                            | NP-centric               | TV-centric         | NP-centric         | TV-centric         |
|                                                            | (1)                      | (2)                | (3)                | (4)                |
| Age                                                        | .007***<br>(.001)        | .009***<br>(.001)  | .008***<br>(.001)  | .008***<br>(.001)  |
| Gender                                                     | .021<br>(.029)           | .056*<br>(.028)    | .038<br>(.028)     | .084**<br>(.027)   |
| Education                                                  | .193***<br>(.021)        | .222***<br>(.022)  | .161***<br>(.020)  | .177***<br>(.021)  |
| Religiosity                                                | .034*<br>(.016)          | .017<br>(.014)     | .047**<br>(.015)   | .021<br>(.014)     |
| Union membership                                           | .231***<br>(.041)        | .319***<br>(.044)  | .236***<br>(.040)  | .315***<br>(.042)  |
| Interest in politics                                       | .537***<br>(.031)        | .533***<br>(.029)  | .562***<br>(.030)  | .541***<br>(.028)  |
| Ideological proximity                                      | .127***<br>(.010)        | .132***<br>(.009)  | .159***<br>(.010)  | .172***<br>(.009)  |
| Television                                                 | -.063**<br>(.024)        | -.045*<br>(.022)   | -.068**<br>(.023)  | -.055**<br>(.021)  |
| Newspapers                                                 | -.176***<br>(.025)       | -.170***<br>(.022) | -.177***<br>(.024) | -.152***<br>(.021) |
| Partisanship                                               | .474***<br>(.019)        | .464***<br>(.018)  | .496***<br>(.018)  | .485***<br>(.018)  |
| Degree of Partisanship<br>(most liked leader's party)      | .366***<br>(.054)        | .457***<br>(.068)  | .407***<br>(.052)  | .471***<br>(.067)  |
| Leader: Most liked leader                                  | .181***<br>(.050)        | .130*<br>(.054)    |                    |                    |
| Leaders: difference between leaders (H)                    |                          |                    | .005<br>(.083)     | .056<br>(.074)     |
| Leaders: Most liked leader*Year                            | .004**<br>(.001)         | .007***<br>(.002)  |                    |                    |
| Leaders: difference between leaders<br>(H)*Year            |                          |                    | .012***<br>(.002)  | .013***<br>(.002)  |
| Degree of Partisanship (most liked<br>leader's party)*Year | -.004**<br>(.002)        | -.007***<br>(.002) | -.004*<br>(.002)   | -.006**<br>(.002)  |
| Year                                                       | -.035**<br>(.013)        | -.032*<br>(.013)   | -.037**<br>(.013)  | -.033**<br>(.013)  |
| Constant                                                   | 1.46***<br>(.419)        | 1.30**<br>(.401)   | 1.31**<br>(.423)   | 1.17**<br>(.408)   |
| Log-likelihood                                             | -16426.126               | -18103.911         | -17544.273         | -19183.908         |
| Wald chi-2                                                 | 4901.96                  | 4533.32            | 5581.96            | 4992.99            |
| AIC                                                        | 32886.25                 | 36241.82           | 35122.55           | 38401.82           |
| BIC                                                        | 33035.67                 | 36391.26           | 35272.57           | 38551.79           |
| N (elections)                                              | 48                       | 48                 | 48                 | 48                 |
| N (observations)                                           | 48497                    | 48572              | 50256              | 50097              |

**Table A6** - Replication of the models in Tables 2 and 3, excluding all countries with a single data point (Austria, Denmark and Ireland)

|                                              | <i>Most liked leader</i> |                    |                    |                    | <i>H</i>           |                    |
|----------------------------------------------|--------------------------|--------------------|--------------------|--------------------|--------------------|--------------------|
|                                              |                          |                    | NP-centric         | TV-centric         | NP-centric         | TV-centric         |
|                                              | (1)                      | (2)                | (3)                | (4)                | (5)                | (6)                |
| Age                                          | .005***<br>(.001)        | .005***<br>(.001)  | .005***<br>(.001)  | .006***<br>(.001)  | .005***<br>(.001)  | .005***<br>(.001)  |
| Gender                                       | .019<br>(.019)           | .049**<br>(.018)   | -.022<br>(.028)    | .058*<br>(.026)    | .007<br>(.027)     | .089***<br>(.025)  |
| Education                                    | .153***<br>(.014)        | .108***<br>(.014)  | .137***<br>(.020)  | .173***<br>(.021)  | .096***<br>(.019)  | .126***<br>(.020)  |
| Religiosity                                  | .001<br>(.010)           | .019*<br>(.009)    | .011<br>(.015)     | .001<br>(.013)     | .024<br>(.014)     | .007<br>(.013)     |
| Union membership                             | .263***<br>(.028)        | .263***<br>(.027)  | .266***<br>(.040)  | .273***<br>(.041)  | .258***<br>(.038)  | .280***<br>(.039)  |
| Interest in politics                         | .476***<br>(.020)        | .488***<br>(.019)  | .460***<br>(.030)  | .464***<br>(.027)  | .484***<br>(.028)  | .467***<br>(.025)  |
| Ideological proximity                        | .133***<br>(.006)        | .185***<br>(.006)  | .131***<br>(.010)  | .135***<br>(.009)  | .179***<br>(.009)  | .189***<br>(.008)  |
| Television                                   | -.110***<br>(.010)       | -.130***<br>(.009) | -.037<br>(.023)    | -.059**<br>(.021)  | -.037<br>(.022)    | -.074***<br>(.020) |
| Newspapers                                   | -.089***<br>(.009)       | -.073***<br>(.009) | -.178***<br>(.024) | -.156***<br>(.020) | -.180***<br>(.023) | -.130***<br>(.020) |
| Partisanship                                 | .702***<br>(.048)        | .703***<br>(.046)  | .641***<br>(.072)  | .728***<br>(.063)  | .659***<br>(.069)  | .713***<br>(.061)  |
| Leader: most liked leader                    | .220***<br>(.028)        |                    | .268***<br>(.045)  | .187***<br>(.036)  |                    |                    |
| Leaders: difference between leaders (H)      |                          | .372***<br>(.040)  |                    |                    | .372***<br>(.064)  | .360***<br>(.052)  |
| Leader: most liked leader*Year               | .005***<br>(.001)        |                    | .003*<br>(.001)    | .007***<br>(.001)  |                    |                    |
| Leaders: difference between leaders (H)*Year |                          | .005***<br>(.001)  |                    |                    | .004*<br>(.002)    | .006***<br>(.002)  |



|                   |                    |                    |                   |                    |                   |                    |
|-------------------|--------------------|--------------------|-------------------|--------------------|-------------------|--------------------|
| Partisanship*Year | -.007***<br>(.001) | -.007***<br>(.001) | -.006**<br>(.002) | -.008***<br>(.002) | -.006**<br>(.002) | -.007***<br>(.002) |
| Year              | -.034*<br>(.015)   | -.036*<br>(.015)   | -.034*<br>(.015)  | -.034*<br>(.014)   | -.036*<br>(.016)  | -.035*<br>(.015)   |
| Constant          | 1.45***<br>(.441)  | 1.21**<br>(.466)   | 1.54**<br>(.473)  | 1.54***<br>(.437)  | 1.28**<br>(.493)  | 1.27**<br>(.463)   |
| Log-likelihood    | -40111.615         | -43280.259         | -18633.489        | -21468.321         | -20065.807        | -23198.325         |
| Wald chi-2        | 9287.70            | 10666.48           | 4689.83           | 4515.48            | 5430.46           | 5118.27            |
| AIC               | 80255.23           | 86592.52           | 37298.98          | 42968.64           | 40163.61          | 46428.65           |
| BIC               | 80407.95           | 86745.87           | 37440.11          | 43110.76           | 40305.35          | 46571.41           |
| N (elections)     | 49                 | 49                 | 49                | 49                 | 49                | 49                 |
| N (observations)  | 103253             | 107408             | 50035             | 53218              | 51986             | 55422              |

**Table A7** – Replication of the models in Tables 2 and 3, excluding cases with FPTP electoral systems (UK)

|                                              | <i>Most liked leader</i> |                    |                    |                    | <i>H</i>           |                    |
|----------------------------------------------|--------------------------|--------------------|--------------------|--------------------|--------------------|--------------------|
|                                              |                          |                    | NP-centric         | TV-centric         | NP-centric         | TV-centric         |
|                                              | (1)                      | (2)                | (3)                | (4)                | (5)                | (6)                |
| Age                                          | .005***<br>(.001)        | .005***<br>(.001)  | .005***<br>(.001)  | .006***<br>(.001)  | .005***<br>(.001)  | .005***<br>(.001)  |
| Gender                                       | .019<br>(.019)           | .049**<br>(.018)   | -.022<br>(.028)    | .058*<br>(.026)    | .007<br>(.027)     | .089***<br>(.025)  |
| Education                                    | .153***<br>(.014)        | .108***<br>(.014)  | .137***<br>(.020)  | .173***<br>(.021)  | .096***<br>(.019)  | .126***<br>(.020)  |
| Religiosity                                  | .001<br>(.010)           | .019*<br>(.009)    | .011<br>(.015)     | .001<br>(.013)     | .024<br>(.014)     | .007<br>(.013)     |
| Union membership                             | .263***<br>(.028)        | .263***<br>(.027)  | .266***<br>(.040)  | .273***<br>(.041)  | .258***<br>(.038)  | .280***<br>(.039)  |
| Interest in politics                         | .476***<br>(.020)        | .488***<br>(.019)  | .460***<br>(.030)  | .464***<br>(.027)  | .484***<br>(.028)  | .467***<br>(.025)  |
| Ideological proximity                        | .133***<br>(.006)        | .185***<br>(.006)  | .131***<br>(.010)  | .135***<br>(.009)  | .179***<br>(.009)  | .189***<br>(.008)  |
| Television                                   | -.110***<br>(.010)       | -.130***<br>(.009) | -.037<br>(.023)    | -.059**<br>(.021)  | -.037<br>(.022)    | -.074***<br>(.020) |
| Newspapers                                   | -.089***<br>(.009)       | -.073***<br>(.009) | -.178***<br>(.024) | -.156***<br>(.020) | -.180***<br>(.023) | -.130***<br>(.020) |
| Partisanship                                 | .702***<br>(.048)        | .703***<br>(.046)  | .641***<br>(.072)  | .728***<br>(.063)  | .659***<br>(.069)  | .713***<br>(.061)  |
| Leader: most liked leader                    | .220***<br>(.028)        |                    | .268***<br>(.045)  | .187***<br>(.036)  |                    |                    |
| Leaders: difference between leaders (H)      |                          | .372***<br>(.040)  |                    |                    | .372***<br>(.064)  | .360***<br>(.052)  |
| Leader: most liked leader*Year               | .005***<br>(.001)        |                    | .003*<br>(.001)    | .007***<br>(.001)  |                    |                    |
| Leaders: difference between leaders (H)*Year |                          | .005***<br>(.001)  |                    |                    | .004*<br>(.002)    | .006***<br>(.002)  |

|                   |                    |                    |                   |                    |                   |                      |
|-------------------|--------------------|--------------------|-------------------|--------------------|-------------------|----------------------|
| Partisanship*Year | -.007***<br>(.001) | -.007***<br>(.001) | -.006**<br>(.002) | -.008***<br>(.002) | -.006**<br>(.002) | -.007***<br>(.002)   |
| Year              | -.034*<br>(.015)   | -.036*<br>(.015)   | -.034*<br>(.015)  | -.034*<br>(.014)   | -.036*<br>(.016)  | -0.0354*<br>(0.0151) |
| Constant          | 1.45***<br>(.441)  | 1.21**<br>(.466)   | 1.54**<br>(.473)  | 1.54***<br>(.437)  | 1.28**<br>(.493)  | 1.27**<br>(.463)     |
| Log-likelihood    | -37144.167         | -40475.766         | -17184.651        | -19949.433         | -18717.092        | -21739.802           |
| Wald chi-2        | 8444.96            | 9792.12            | 4219.54           | 4166.03            | 4948.18           | 4756.14              |
| AIC               | 74320.33           | 80983.53           | 34401.3           | 39930.87           | 37466.18          | 43511.6              |
| BIC               | 74472.11           | 81136.03           | 34541.52          | 40072              | 37607.11          | 43653.47             |
| N (elections)     | 48                 | 48                 | 48                | 48                 | 48                | 48                   |
| N (observations)  | 97313              | 101829             | 47261             | 50052              | 49421             | 52408                |
| <i>N</i>          | 97313              | 101829             | 47261             | 50052              | 49421             | 52408                |

**Table A8** – Question wording and recoding strategy for leader thermometer variables

| Country | Year                         | Question wording                                                                                                                                                                                                                                                                                                                                | Answer scale                                    | Recoding strategy (if any)                                                                                                                                                        |
|---------|------------------------------|-------------------------------------------------------------------------------------------------------------------------------------------------------------------------------------------------------------------------------------------------------------------------------------------------------------------------------------------------|-------------------------------------------------|-----------------------------------------------------------------------------------------------------------------------------------------------------------------------------------|
| Austria | 2013                         | How much do you like the following politicians? Please rate each politician on a scale from 0 to 10. 0 means you strongly dislike that politician and 10 means that you strongly like that politician.                                                                                                                                          | 0. Strongly dislike<br>10. Strongly like        | <i>none</i>                                                                                                                                                                       |
| Denmark | 2005                         | I would like to ask you how well or bad you think of some of our political leaders when 0 means you think very bad about the person and 10 means you think really well about the person.                                                                                                                                                        | 0. Very bad<br>10. Very good                    | <i>none</i>                                                                                                                                                                       |
| Finland | 2003<br>2007<br>2011<br>2015 | Rate the following leaders on a scale from 0 (strongly dislike) to 10 (strongly like).                                                                                                                                                                                                                                                          | 0. Strongly dislike<br>10. Strongly like        | <i>none</i>                                                                                                                                                                       |
| Germany | 2002                         | Generally speaking, what do you think of [LEADER] ? Please use the following scale. “+5” means that you have a very positive view of this politician, whereas “-5” means that you have a very negative view of this politician.                                                                                                                 | -5. Very negative view<br>5. Very positive view | 5-points were added to the original scale, so that the recoded scale ranges from 0 to 10                                                                                          |
|         | 2009<br>2013                 | Please tell me what you think about some leading politicians. Please use the scale from - 5 to + 5 for this purpose.                                                                                                                                                                                                                            | -5. Strongly dislike<br>5. Strongly like        | 5-points were added to the original scale, so that the recoded scale ranges from 0 to 10                                                                                          |
| Greece  | 1985<br>1996                 | We would like to know your feelings towards some persons and social organization on a scale from 0-10. If you feel very favorable towards this person, you can give him the highest score of 10; if you feel hostile towards this person you can give him a 0 (zero); if you feel absolutely neutral towards this person, you can give him a 5. | 1. Hostile<br>10. Favorable                     | Values from 1 to 5 in the original scale were recoded by subtracting 1-point, so that the recoded scale ranges from 0 to 10 with no observations in the middle point of the scale |

| Country     | Year                         | Question wording                                                                                                                                                                                                                                                              | Answer scale                                | Recoding strategy (if any)                                                                                                                                                        |
|-------------|------------------------------|-------------------------------------------------------------------------------------------------------------------------------------------------------------------------------------------------------------------------------------------------------------------------------|---------------------------------------------|-----------------------------------------------------------------------------------------------------------------------------------------------------------------------------------|
| Ireland     | 2007                         | And what do you think of the party leaders? After I read the name of a party leader, please rate them on a scale from 0 to 10, where 0 means you strongly dislike that candidate and 10 means that you strongly like that candidate.                                          | 0. Strongly dislike<br>10. Strongly like    | <i>none</i>                                                                                                                                                                       |
| Italy       | 1985                         | How much sympathy do you have for the political leaders that I am about to read? Please use a scale from 1 to 10, where 1 means "no sympathy" and 10 means "much sympathy".                                                                                                   | 1. No sympathy<br>10. Much sympathy         | Values from 1 to 5 in the original scale were recoded by subtracting 1-point, so that the recoded scale ranges from 0 to 10 with no observations in the middle point of the scale |
|             | 1990<br>1996<br>2001<br>2006 | I shall now read you a list of national politicians. For each of them tell me whether you have ever heard of them and, if so, give them a score from 1 to 10 according to your opinion of them: 1 means a totally negative judgment and 10 means a totally positive judgment. | 1. Totally negative<br>10. Totally positive | Values from 1 to 5 in the original scale were recoded by subtracting 1-point, so that the recoded scale ranges from 0 to 10 with no observations in the middle point of the scale |
|             | 2013                         | I shall now read you a list of national politicians. For each of them tell me whether you have ever heard of them and, if so, give them a score from 0 to 10 according to your opinion of them: 0 means a totally negative judgment and 10 means a totally positive judgment. | 0. Totally negative<br>10. Totally positive | <i>none</i>                                                                                                                                                                       |
| Netherlands | 1986<br>1989<br>1994<br>1998 | <i>See: Thomassen, J. (2005). The European Voter. Oxford: Oxford University Press</i>                                                                                                                                                                                         |                                             | <i>none</i>                                                                                                                                                                       |

| Country     | Year                 | Question wording                                                                                                                                                                                                                                                                                              | Answer scale                                   | Recoding strategy (if any)                                                                                                                                                        |
|-------------|----------------------|---------------------------------------------------------------------------------------------------------------------------------------------------------------------------------------------------------------------------------------------------------------------------------------------------------------|------------------------------------------------|-----------------------------------------------------------------------------------------------------------------------------------------------------------------------------------|
| Netherlands | 2002                 | I would also like to know how sympathetic you find the following politicians. You can give each [politician] a score between 0 and 100. The more sympathetic you find a [politician] , the higher the score you give. A score of 50 means that you find a [politician] neither sympathetic nor unsympathetic. | 0. Very unsympathetic<br>100. Very sympathetic | The original values were divided by 10 and then rounded to the nearest integer value, so that the recoded scale ranges from 0 to 10                                               |
|             | 2006<br>2010         | I would like to know from you how sympathetic you find party leaders. To this end you can give points between 0 and 10 to the respective party leaders. 0 means that you find this party leader very unsympathetic and 10 means that you find this party leader very sympathetic.                             | 0. Very unsympathetic<br>10. Very sympathetic  | <i>none</i>                                                                                                                                                                       |
| Portugal    | 1985                 | I will now give you the names of some Portuguese politicians. Using the same scale from 0 to 10 tell me which number corresponds to the degree of sympathy you have for the following political leaders.                                                                                                      | 0. No sympathy<br>10. A lot of sympathy        | <i>none</i>                                                                                                                                                                       |
|             | 1993                 | I would like you to tell me how much sympathy do you have for the following personalities. I have numbers from 1 to 10, in which 10 means you have very much sympathy and 1 none. Which number would you use to classify your sympathy for [politician]                                                       | 1. No sympathy<br>10. A lot of sympathy        | Values from 1 to 5 in the original scale were recoded by subtracting 1-point, so that the recoded scale ranges from 0 to 10 with no observations in the middle point of the scale |
|             | 2002                 | Degree of sympathy for political leaders                                                                                                                                                                                                                                                                      | 0. Great antipathy<br>10. Great sympathy       | <i>none</i>                                                                                                                                                                       |
|             | 2005                 | <i>n/a</i>                                                                                                                                                                                                                                                                                                    | 0. Great antipathy<br>10. Great sympathy       | <i>none</i>                                                                                                                                                                       |
|             | 2009<br>2011<br>2015 | I would like to know what you think about each one of our political leaders, using a scale from 0 to 10, where ZERO means Great dislike for the political leader, TEN means that you fell Great sympathy for the leader and FIVE you feel indifference for the leader                                         | 0. Great dislike<br>10. Great sympathy         | <i>none</i>                                                                                                                                                                       |

| Country     | Year                 | Question wording                                                                                                                                                                                                                                                                      | Answer scale                               | Recoding strategy (if any)                                                               |
|-------------|----------------------|---------------------------------------------------------------------------------------------------------------------------------------------------------------------------------------------------------------------------------------------------------------------------------------|--------------------------------------------|------------------------------------------------------------------------------------------|
| Spain       | 2000                 | I'm going to read out a series of political leaders' names. Please tell me, for each one, whether you know of them and how you value their political performance. Grade them from 0 to 10, where 0 means that you value them "very bad" and 10 means that you value them "very good". | 0. Very bad<br>10. Very good               | none                                                                                     |
|             | 2008                 |                                                                                                                                                                                                                                                                                       |                                            |                                                                                          |
|             | 2011                 |                                                                                                                                                                                                                                                                                       |                                            |                                                                                          |
|             | 2015                 |                                                                                                                                                                                                                                                                                       |                                            |                                                                                          |
|             | 2016                 |                                                                                                                                                                                                                                                                                       |                                            |                                                                                          |
| Sweden      | 1985                 | <i>See: Thomassen, J. (2005). The European Voter. Oxford: Oxford University Press</i>                                                                                                                                                                                                 |                                            | none                                                                                     |
|             | 1988                 |                                                                                                                                                                                                                                                                                       |                                            |                                                                                          |
|             | 1991                 |                                                                                                                                                                                                                                                                                       |                                            |                                                                                          |
|             | 1994                 |                                                                                                                                                                                                                                                                                       |                                            |                                                                                          |
|             | 1998                 |                                                                                                                                                                                                                                                                                       |                                            |                                                                                          |
|             | 2002                 | On this card there is a kind of scale. I would like you to use it to illustrate how much you like or dislike the different [party leaders]. Use 'plus' figures for [party leaders] you like and 'minus' figures for [party leaders] parties you dislike.                              | -5. Strongly dislike<br>5. Strongly like   | 5-points were added to the original scale, so that the recoded scale ranges from 0 to 10 |
|             | 2006                 | I'd like to know what you think about each of our [political leaders]. Please rate the [political leaders] on a scale from 0 to 10, where 0 means you strongly dislike that [political leader] and 10 means that you strongly like that [political leader].                           | 0. Strongly dislike<br>10. Strongly like   | none                                                                                     |
|             | 2010                 | On this card there is a kind of scale. I would like you to use it to illustrate how much you like or dislike the different [party leaders]. Use 'plus' figures for [party leaders] you like and 'minus' figures for [party leaders] parties you dislike.                              | -5. Strongly dislike<br>5. Strongly like   | 5-points were added to the original scale, so that the recoded scale ranges from 0 to 10 |
| Switzerland | 1995                 | Here is another list of other known politicians. Can you tell me every time, what level of sympathy do you have for him or her on a scale ranging from 0 to 10, where 0 means "no sympathy" and 10 "very strong sympathy"?                                                            | 0. No sympathy<br>10. Very strong sympathy | none                                                                                     |
| Switzerland | 2007<br>2011<br>2015 | And can you tell me what sympathy you have for the following political figures on a scale from 0 to 10, where 0 means "no sympathy" and 10 "very strong sympathy"?                                                                                                                    | 0. No sympathy<br>10. Very strong sympathy | none                                                                                     |

| Country        | Year         | Question wording                                                                                                                                                                   | Answer scale                             | Recoding strategy (if any) |
|----------------|--------------|------------------------------------------------------------------------------------------------------------------------------------------------------------------------------------|------------------------------------------|----------------------------|
| United Kingdom | 1974         | <i>See: Thomassen, J. (2005). The European Voter. Oxford: Oxford University Press</i>                                                                                              | 0. Minimum                               | <i>none</i>                |
|                | 1974         |                                                                                                                                                                                    | 10. Maximum                              |                            |
|                | 2010<br>2015 | Now, let's think more generally about the party leaders. Using a scale that runs from 0 to 10, where 0 means strongly dislike and 10 means strongly like, how do you feel about... | 0. Strongly dislike<br>10. Strongly like | <i>none</i>                |



**Table A9** – Question wording and recoding strategy for variables on exposure to political information in the newspapers

| Country | Year                         | Question wording                                                                                                                                                                            | Answer scale                                                                                                                   | Recoding strategy                                                                      | Notes                                                                                                                                          |
|---------|------------------------------|---------------------------------------------------------------------------------------------------------------------------------------------------------------------------------------------|--------------------------------------------------------------------------------------------------------------------------------|----------------------------------------------------------------------------------------|------------------------------------------------------------------------------------------------------------------------------------------------|
| Austria | 2013                         | How often do you read newspapers to learn about political events in Austria?                                                                                                                | 1. Almost every day<br>2. Several times a week<br>3. Several times a month<br>4. Less frequently<br>5. Never                   | <i>Always:</i> 1<br><i>Often:</i> 2<br><i>Rarely:</i> 3<br><i>Never:</i> 4, 5          |                                                                                                                                                |
| Denmark | 2005                         | How often: reading newspaper                                                                                                                                                                | 1. Every day<br>2. 5-6 times a week<br>3. 3-4 times a week<br>4. 1-2 times a week<br>5. Less than once a week<br>6. Never      | <i>Always:</i> 1, 2<br><i>Often:</i> 3<br><i>Rarely:</i> 4<br><i>Never:</i> 5, 6       |                                                                                                                                                |
| Finland | 2003<br>2007<br>2011<br>2015 | How much attention did you pay to media coverage of the parliamentary elections in newspaper articles?                                                                                      | 1. A great deal of attention<br>2. A fair amount of attention<br>3. Only a little<br>4. Paid no attention at all               | <i>Always:</i> 1<br><i>Often:</i> 2<br><i>Rarely:</i> 3<br><i>Never:</i> 4             |                                                                                                                                                |
| Germany | 2002<br>2009<br>2013         | Here on this list you can see different newspapers. On how many days of the week on average do you read reports on political events in Germany in [NEWSPAPER] during the election campaign? | <i>Number of days per week</i>                                                                                                 | <i>Always:</i> 7, 6<br><i>Often:</i> 5, 4, 3<br><i>Rarely:</i> 2, 1<br><i>Never:</i> 0 | Respondents were asked how often they read news on different newspapers. We have taken the value of the respondent's most often read newspaper |
| Greece  | 1985                         | How often do your read daily newspapers?                                                                                                                                                    | 1. Daily<br>2. 3-4 times a week<br>3. Once a week<br>4. Hardly ever<br>5. Never                                                | <i>Always:</i> 1<br><i>Often:</i> 2<br><i>Rarely:</i> 3<br><i>Never:</i> 4, 5          |                                                                                                                                                |
|         | 1996                         | During the electoral campaign, how frequently did you follow political news through newspapers?                                                                                             | 1. Every day or almost every day<br>2. 3-4 days a week<br>3. 1-2 days a week<br>4. Less frequently<br>5. Never or almost never | <i>Always:</i> 1<br><i>Often:</i> 2<br><i>Rarely:</i> 3<br><i>Never:</i> 4, 5          |                                                                                                                                                |

| Country     | Year                                 | Question wording                                                                                                              | Answer scale                                                                                                                                                                    | Recoding strategy                                                       | Notes |
|-------------|--------------------------------------|-------------------------------------------------------------------------------------------------------------------------------|---------------------------------------------------------------------------------------------------------------------------------------------------------------------------------|-------------------------------------------------------------------------|-------|
| Ireland     | 2007                                 | On a scale 0 - 7, where 0 means never and 7 means every day, how often do you do the following? Read the newspaper            | <i>Number of days per week</i>                                                                                                                                                  | <i>Always: 7, 6<br/>Often: 5, 4, 3<br/>Rarely: 2, 1<br/>Never: 0</i>    |       |
| Italy       | 1985                                 | How often do your read daily newspapers?                                                                                      | 1. Daily<br>2. 3-4 times a week<br>3. Once a week<br>4. Hardly ever<br>5. Never                                                                                                 | <i>Always: 1<br/>Often: 2<br/>Rarely: 3<br/>Never: 4, 5</i>             |       |
|             | 1990<br>1996<br>2001<br>2006         | Do you usually read a newspaper? If so, how frequently?                                                                       | 1. Don't read<br>2. Less than once a week<br>3. 1-2 days a week<br>4. 3-5 days a week<br>5. (Almost) Every day                                                                  | <i>Always: 5<br/>Often: 4<br/>Rarely: 3<br/>Never: 2, 1</i>             |       |
|             | 2013                                 | Do you usually read a newspaper – physically or online, excluding sports' news? If so, how frequently?                        | 1. No, never<br>2. Less than once a week<br>3. 1 day a week<br>4. 2 days a week<br>5. 3 days a week<br>6. 4 days a week<br>7. 5 days a week<br>8. 6 days a week<br>9. Every day | <i>Always: 9, 8<br/>Often: 7, 6, 5<br/>Rarely: 4, 3<br/>Never: 2, 1</i> |       |
| Netherlands | 1986<br>1989<br>1994<br>1998<br>2002 | When there is domestic news in the newspapers, for example news about governmental problems, how often do you read such news? | 1. (Nearly) Always<br>2. Often<br>3. Now and then<br>4. Seldom or never<br>5. Does not read newspaper                                                                           | <i>Always: 1<br/>Often: 2<br/>Rarely: 3<br/>Never: 4, 5</i>             |       |
|             | 2006<br>2010                         | How often do you read a newspaper?                                                                                            | 1. (Almost) daily<br>2. A few times a week<br>3. A few times a month<br>4. Seldom or never                                                                                      | <i>Always: 1<br/>Often: 2<br/>Rarely: 3<br/>Never: 4</i>                |       |

| Country  | Year                                 | Question wording                                                                                                                                  | Answer scale                                                                                                                                     | Recoding strategy                                                             | Notes |
|----------|--------------------------------------|---------------------------------------------------------------------------------------------------------------------------------------------------|--------------------------------------------------------------------------------------------------------------------------------------------------|-------------------------------------------------------------------------------|-------|
| Portugal | 1985                                 | How often do you read daily newspapers?                                                                                                           | 1. Daily<br>2. 3-4 times a week<br>3. Once a week<br>4. Hardly ever<br>5. Never                                                                  | <i>Always: 1</i><br><i>Often: 2</i><br><i>Rarely: 3</i><br><i>Never: 4, 5</i> |       |
|          | 1993                                 | How frequently do you read weekly newspapers?                                                                                                     | 1. Less frequently<br>2. 1-2 times a week<br>3. 2/3 times a week<br>4. Every week                                                                | <i>Always: 4</i><br><i>Often: 3</i><br><i>Rarely: 2</i><br><i>Never: 1</i>    |       |
|          | 2002                                 | Frequency of readership of political news in the newspaper                                                                                        | 1. Every day<br>2. Several times a week<br>3. Once a week<br>4. Less than once a week<br>5. Never                                                | <i>Always: 1</i><br><i>Often: 2</i><br><i>Rarely: 3</i><br><i>Never: 4, 5</i> |       |
|          | 2005                                 | During the electoral campaign, how often did you follow political news in newspapers?                                                             | 1. Daily/almost every day<br>2. 3-4 days a week<br>3. 1-2 days a week<br>4. Less frequently<br>5. Never                                          | <i>Always: 1</i><br><i>Often: 2</i><br><i>Rarely: 3</i><br><i>Never: 4, 5</i> |       |
|          | 2009<br>2011<br>2015                 | During the electoral campaign, how often did you follow political news in newspapers or magazines, in paper or online?                            | 1. Daily/almost every day<br>2. 3-4 days a week<br>3. 1-2 days a week<br>4. Less frequently<br>5. Never                                          | <i>Always: 1</i><br><i>Often: 2</i><br><i>Rarely: 3</i><br><i>Never: 4, 5</i> |       |
| Spain    | 2000<br>2008<br>2011<br>2015<br>2016 | During this electoral campaign, could you tell me how frequently have you followed electoral and political information in the general newspapers? | 1. Every day or almost every day<br>2. 4-5 days a week<br>3. 2-3 days a week<br>4. Only on the weekends<br>5. Rarely<br>6. Never or almost never | <i>Always: 1</i><br><i>Often: 2</i><br><i>Rarely: 4, 5</i><br><i>Never: 6</i> |       |

| Country        | Year | Question wording                                                                                               | Answer scale                                                                                 | Recoding strategy                                                          | Notes |
|----------------|------|----------------------------------------------------------------------------------------------------------------|----------------------------------------------------------------------------------------------|----------------------------------------------------------------------------|-------|
| Sweden         | 1985 | How often do you read news and articles about politics in the daily press?                                     | 1. Never                                                                                     | <i>Always: 4</i>                                                           |       |
|                | 1988 |                                                                                                                | 2. Occasionally                                                                              | <i>Often: 3</i>                                                            |       |
|                | 1991 |                                                                                                                | 3. Often                                                                                     | <i>Rarely: 2</i>                                                           |       |
|                | 1994 |                                                                                                                | 4. Every day                                                                                 | <i>Never: 1</i>                                                            |       |
|                | 1998 |                                                                                                                |                                                                                              |                                                                            |       |
|                | 2002 |                                                                                                                |                                                                                              |                                                                            |       |
|                | 2006 |                                                                                                                |                                                                                              |                                                                            |       |
|                | 2010 |                                                                                                                |                                                                                              |                                                                            |       |
| Switzerland    | 2007 | How many days/week does R read news in the newspaper                                                           | <i>Number of days per week</i>                                                               | <i>Always: 7, 6</i>                                                        |       |
|                | 2011 |                                                                                                                |                                                                                              | <i>Often: 5, 4, 3</i><br><i>Rarely: 2, 1</i><br><i>Never: 0</i>            |       |
|                | 2015 | I would like to know how attentively have you followed, over the last days, political affairs on [newspapers]  | 1. Not at all attentive<br>2. Not very attentive<br>3. Rather attentive<br>4. Very attentive | <i>Always: 4</i><br><i>Often: 3</i><br><i>Rarely: 2</i><br><i>Never: 1</i> |       |
| United Kingdom | 1974 | How closely do you follow politics on the newspapers?                                                          | 1. Very closely                                                                              | <i>Always: 1</i>                                                           |       |
|                | 1974 |                                                                                                                | 2. Fairly closely<br>3. Once in a while<br>4. Not at all                                     | <i>Often: 2</i><br><i>Rarely: 3</i><br><i>Never: 4</i>                     |       |
|                | 2010 | Do you regularly read about politics or current affairs in one or more newspapers (either online or in print)? | 1. Yes                                                                                       | <i>Always: n/a</i>                                                         |       |
|                | 2015 |                                                                                                                | 2. No                                                                                        | <i>Often: 1</i><br><i>Rarely: n/a</i><br><i>Never: 2</i>                   |       |

**Table A10** – Question wording and recoding strategy for variables on exposure to political information on television

| Country | Year                 | Question wording                                                                                                                                                                | Answer scale                                                                                                              | Recoding strategy                                                                      | Notes                                                                                                                                                                     |
|---------|----------------------|---------------------------------------------------------------------------------------------------------------------------------------------------------------------------------|---------------------------------------------------------------------------------------------------------------------------|----------------------------------------------------------------------------------------|---------------------------------------------------------------------------------------------------------------------------------------------------------------------------|
| Austria | 2013                 | How often do you use the television to learn about political events in Austria?                                                                                                 | 1. Almost every day<br>2. Several times a week<br>3. Several times a month<br>4. Less frequently<br>5. Never              | <i>Always:</i> 1<br><i>Often:</i> 2<br><i>Rarely:</i> 3<br><i>Never:</i> 4, 5          |                                                                                                                                                                           |
| Denmark | 2005                 | How often: news on [CHANNEL]                                                                                                                                                    | 1. Every day<br>2. 5-6 times a week<br>3. 3-4 times a week<br>4. 1-2 times a week<br>5. Less than once a week<br>6. Never | <i>Always:</i> 1, 2<br><i>Often:</i> 3<br><i>Rarely:</i> 4<br><i>Never:</i> 5, 6       | Respondents were asked how often they watched TV news on 3 different channels (TV2 News; DR1; DR2). We have taken the value of the respondent's most watched news channel |
| Finland | 2003<br>2011<br>2015 | How much attention did you pay to media coverage of the parliamentary elections in television news and current affairs programmes?                                              | 1. A great deal of attention<br>2. A fair amount of attention<br>3. Only a little<br>4. Paid no attention at all          | <i>Always:</i> 1<br><i>Often:</i> 2<br><i>Rarely:</i> 3<br><i>Never:</i> 4             |                                                                                                                                                                           |
|         | 2007                 | How much important information did you get for your voting choice from news and current affairs programmes on television?                                                       | 1. A great deal of attention<br>2. A fair amount of attention<br>3. Only a little<br>4. Paid no attention at all          | <i>Always:</i> 1<br><i>Often:</i> 2<br><i>Rarely:</i> 3<br><i>Never:</i> 4             |                                                                                                                                                                           |
| Germany | 2002                 | How often do you watch news casts on the first or second channel? What is meant here are the news casts of ARD or ZDF, namely Tagesschau, Tagesthemen, Heute and Heute-Journal. | <i>Number of days per week</i>                                                                                            | <i>Always:</i> 7, 6<br><i>Often:</i> 5, 4, 3<br><i>Rarely:</i> 2, 1<br><i>Never:</i> 0 | Respondents were asked how often they watched TV news on different channels. We have taken the value of the respondent's most watched news channel                        |
|         | 2009<br>2013         | On average, on how many days of the week did you watch Tagesschau or Tagesthemen on ARD during the election campaign?                                                           | <i>Number of days per week</i>                                                                                            | <i>Always:</i> 7, 6<br><i>Often:</i> 5, 4, 3<br><i>Rarely:</i> 2, 1<br><i>Never:</i> 0 | Respondents were asked how often they watched TV news on different channels. We have taken the value of the respondent's most watched news channel                        |
| Country | Year                 | Question wording                                                                                                                                                                | Answer scale                                                                                                              | Recoding strategy                                                                      | Notes                                                                                                                                                                     |

| Greece      | 1985                         | Can you tell me how frequently you watch television?                                                          | 1. Daily<br>2. 3-4 days a week<br>3. Once a week<br>4. Hardly ever<br>5. Never                                                 | <i>Always:</i> 1<br><i>Often:</i> 2<br><i>Rarely:</i> 3<br><i>Never:</i> 4, 5          |                                                                    |
|-------------|------------------------------|---------------------------------------------------------------------------------------------------------------|--------------------------------------------------------------------------------------------------------------------------------|----------------------------------------------------------------------------------------|--------------------------------------------------------------------|
|             | 1996                         | During the electoral campaign, how frequently did you follow political news through television?               | 1. Every day or almost every day<br>2. 3-4 days a week<br>3. 1-2 days a week<br>4. Less frequently<br>5. Never or almost never | <i>Always:</i> 1<br><i>Often:</i> 2<br><i>Rarely:</i> 3<br><i>Never:</i> 4, 5          |                                                                    |
| Ireland     | 2007                         | On a scale 0 - 7, where 0 means never and 7 means every day, how often do you do the following? Watch TV news | <i>Number of days per week</i>                                                                                                 | <i>Always:</i> 7, 6<br><i>Often:</i> 5, 4, 3<br><i>Rarely:</i> 2, 1<br><i>Never:</i> 0 |                                                                    |
| Italy       | 1985                         | Can you tell me how frequently you watch television?                                                          | 1. Every day<br>2. 3 times a week<br>3. Once a week<br>4. Rare<br>5. Never                                                     | <i>Always:</i> 1<br><i>Often:</i> 2<br><i>Rarely:</i> 3<br><i>Never:</i> 4, 5          |                                                                    |
|             | 1990<br>2001<br>2006<br>2013 | Do you usually watch news programs? If so, how frequently?                                                    | 1. Never<br>2. Less than once a week<br>3. 1-2 days a week<br>4. 3-5 days a week<br>5. (Almost) Every day                      | <i>Always:</i> 5<br><i>Often:</i> 4<br><i>Rarely:</i> 3<br><i>Never:</i> 2, 1          |                                                                    |
|             | 1996                         | During the election campaign did you happen to see any TV news programmes? If so, how often?                  | 1. Never<br>2. Less than once a week<br>3. 1-2 days a week<br>4. 3-5 days a week<br>5. (Almost) Every day                      | <i>Always:</i> 5<br><i>Often:</i> 4<br><i>Rarely:</i> 3<br><i>Never:</i> 2, 1          |                                                                    |
| Country     | Year                         | Question wording                                                                                              | Answer scale                                                                                                                   | Recoding strategy                                                                      | Notes                                                              |
| Netherlands | 1986<br>1989                 | Could you indicate on this showcard how often you generally watch the [CHANNEL] television newscast?          | 1. (Almost) daily<br>2. 3-4 times per week                                                                                     | <i>Always:</i> 1<br><i>Often:</i> 2                                                    | Respondents were asked how often they watched TV news on different |

|          | 1994<br>1998<br>2002         |                                                                                                                                           | 3. 1-2 times per week<br>4. Less than once a week<br>5. Does not own a TV set                           | <i>Rarely: 3</i><br><i>Never: 4, 5</i>                                        | channels. We have taken the value of the respondent's most watched news channel                                                                    |
|----------|------------------------------|-------------------------------------------------------------------------------------------------------------------------------------------|---------------------------------------------------------------------------------------------------------|-------------------------------------------------------------------------------|----------------------------------------------------------------------------------------------------------------------------------------------------|
|          | 2006<br>2010                 | How often do you watch a newscast?                                                                                                        | 1. (Almost) daily<br>2. 3-4 times per week<br>3. 1-2 times per week<br>4. Less than once a week         | <i>Always: 1</i><br><i>Often: 2</i><br><i>Rarely: 3</i><br><i>Never: 4, 5</i> | Respondents were asked how often they watched TV news on different channels. We have taken the value of the respondent's most watched news channel |
| Portugal | 1985                         | Can you tell me how frequently you watch television?                                                                                      | 1. Every day<br>2. 3 times a week<br>3. Once a week<br>4. Rare<br>5. Never                              | <i>Always: 1</i><br><i>Often: 2</i><br><i>Rarely: 3</i><br><i>Never: 4, 5</i> |                                                                                                                                                    |
|          | 1993                         | How often do you watch news on television?                                                                                                | 1. Less frequently<br>2. Once or twice a week<br>3. 3-4 times a week<br>4. (Almost) every day           | <i>Always: 4</i><br><i>Often: 3</i><br><i>Rarely: 2</i><br><i>Never: 1</i>    |                                                                                                                                                    |
|          | 2002                         | Frequency watching news or programs about politics on television                                                                          | 1. Every day<br>2. Several times a week<br>3. Once a week<br>4. Less than once a week<br>5. Never       | <i>Always: 1</i><br><i>Often: 2</i><br><i>Rarely: 3</i><br><i>Never: 4, 5</i> |                                                                                                                                                    |
|          | 2005<br>2009<br>2011<br>2015 | During the electoral campaign, how often did you follow political news on television?                                                     | 1. Daily/almost every day<br>2. 3-4 days a week<br>3. 1-2 days a week<br>4. Less frequently<br>5. Never | <i>Always: 1</i><br><i>Often: 2</i><br><i>Rarely: 3</i><br><i>Never: 4, 5</i> |                                                                                                                                                    |
| Country  | Year                         | Question wording                                                                                                                          | Answer scale                                                                                            | Recoding strategy                                                             | Notes                                                                                                                                              |
| Spain    | 2000<br>2008<br>2011         | During this electoral campaign, could you tell me how frequently have you followed electoral and political information on the television? | 1. Every day or almost every day<br>2. 4-5 days a week<br>3. 2-3 days a week<br>4. Only on the weekends | <i>Always: 1</i><br><i>Often: 2</i><br><i>Rarely: 4, 5</i><br><i>Never: 6</i> |                                                                                                                                                    |

|                |      |                                                                                                                         |                                |                       |
|----------------|------|-------------------------------------------------------------------------------------------------------------------------|--------------------------------|-----------------------|
|                | 2015 |                                                                                                                         | 5. Rarely                      |                       |
|                | 2016 |                                                                                                                         | 6. Never or almost never       |                       |
| Sweden         | 1985 | How often do you watch Rapport (TV, national channel 2)?                                                                | 1. 6-7 days a week             | <i>Always: 1</i>      |
|                | 1988 |                                                                                                                         | 2. 3-5 days a week             | <i>Often: 2</i>       |
|                | 1991 |                                                                                                                         | 3. 1-2 days a week             | <i>Rarely: 3</i>      |
|                | 1994 |                                                                                                                         | 4. More seldom                 | <i>Never: 4, 5</i>    |
|                | 1998 |                                                                                                                         | 5. Never                       |                       |
|                | 2002 |                                                                                                                         |                                |                       |
|                | 2006 |                                                                                                                         |                                |                       |
|                | 2010 |                                                                                                                         |                                |                       |
| Switzerland    | 2007 | How many days/week does R watch news on TV                                                                              | <i>Number of days per week</i> | <i>Always: 7, 6</i>   |
|                | 2011 |                                                                                                                         |                                | <i>Often: 5, 4, 3</i> |
|                |      |                                                                                                                         |                                | <i>Rarely: 2, 1</i>   |
|                |      |                                                                                                                         |                                | <i>Never: 0</i>       |
|                | 2015 | I would like to know how attentively have you followed, over the last days, political affairs on [television]           | 1. Not at all attentive        | <i>Always: 4</i>      |
|                |      |                                                                                                                         | 2. Not very attentive          | <i>Often: 3</i>       |
|                |      |                                                                                                                         | 3. Rather attentive            | <i>Rarely: 2</i>      |
|                |      |                                                                                                                         | 4. Very attentive              | <i>Never: 1</i>       |
| United Kingdom | 1974 | How closely do you follow politics on TV?                                                                               | 1. Very closely                | <i>Always: 1</i>      |
|                | 1974 |                                                                                                                         | 2. Fairly closely              | <i>Often: 2</i>       |
|                |      |                                                                                                                         | 3. Once in a while             | <i>Rarely: 3</i>      |
|                |      |                                                                                                                         | 4. Not at all                  | <i>Never: 4</i>       |
|                | 2010 | On a typical day, how much time do you spend watching television news or programmes about politics and current affairs? | 1. None, no time at all        | <i>Always: 5, 4</i>   |
|                | 2015 |                                                                                                                         | 2. Less than 1/2 hour          | <i>Often: 3</i>       |
|                |      |                                                                                                                         | 3. 1/2 hour to 1 hour          | <i>Rarely: 2</i>      |
|                |      |                                                                                                                         | 4. 1 to 2 hours                | <i>Never: 1</i>       |
|                |      |                                                                                                                         | 5. More than 2 hours           |                       |
